# Supplementary material for: Targeting lipid biosynthesis pathways for hepatitis B virus cure
Source: PubMed Central journal article supplement (PMC9352027; doi:10.1371/journal.pone.0270273), 2022-08-04
Supplement: pone.0270273.s004.pdf [file pone.0270273.s004.pdf]

**S2 Table.** Top dysregulated genes in the HBV-infected livers from chimeric humanized mice compared to non-infected mice based on RNAseq analysis.

| Gene    | logFC    | AveExpr  | P.Value  | adj.P.Val |
|---------|----------|----------|----------|-----------|
| MDM2    | 0.439643 | 5.729676 | 1.1E-05  | 0.090299  |
| RRS1    | -0.90088 | 1.597069 | 2.87E-05 | 0.090299  |
| DNAJB9  | -0.30468 | 5.539102 | 2.93E-05 | 0.090299  |
| DNAJA1  | -0.41704 | 7.141932 | 3.65E-05 | 0.090299  |
| GCH1    | -0.44939 | 4.753297 | 3.92E-05 | 0.090299  |
| GRAMD2B | 0.60087  | 3.401326 | 5.12E-05 | 0.091752  |
| ZFPM1   | -0.5981  | 4.029819 | 5.58E-05 | 0.091752  |
| JMJD1C  | 0.329415 | 5.743186 | 0.000118 | 0.144507  |
| RICTOR  | 0.328365 | 4.690555 | 0.000125 | 0.144507  |
| NAV2    | -0.43841 | 5.191206 | 0.000127 | 0.144507  |
