# Supplementary material for: Targeting lipid biosynthesis pathways for hepatitis B virus cure
Source: PubMed Central journal article supplement (PMC9352027; doi:10.1371/journal.pone.0270273), 2022-08-04
Supplement: pone.0270273.s005.pdf [file pone.0270273.s005.pdf]

**S3 Table.** Anti-HBV activity and toxicity of compounds modulating lipid pathways.

| Common Name and Target                   | IUPAC                                                                                                                                                                          | Activity in HBV-infected HepG2-NTCP cells |                              |                                       |
|------------------------------------------|--------------------------------------------------------------------------------------------------------------------------------------------------------------------------------|-------------------------------------------|------------------------------|---------------------------------------|
|                                          |                                                                                                                                                                                | HBsAg, EC <sub>50</sub> (nM)              | HBeAg, EC <sub>50</sub> (nM) | Cell viability, CC <sub>50</sub> (nM) |
| ACC inhibitor                            | 2-(1-((R)-2-(((1s,4S)-4-hydroxycyclohexyl)oxy)-2-(2-methoxyphenyl)ethyl)-5-methyl-6-(oxazol-2-yl)-2,4-dioxo-1,4-dihydrothieno[2,3-d]pyrimidin-3(2H)-yl)-2-methylpropanoic acid | 29                                        | 9600                         | >10000                                |
| FASN inhibitor                           | 4-(1-(5-(2-cyclopropyl-4-methyl-1H-imidazol-5-yl)-2,4-dimethylbenzoyl)-3-fluoroazetid-3-yl)benzotrile                                                                          | 81                                        | >10000                       | >10000                                |
| SKI-1/S1P inhibitor                      | (R)-4-((diethylamino)methyl)-N-(2-methoxyphenethyl)-N-(pyrrolidin-3-yl)benzamide                                                                                               | 790                                       | >10000                       | >10000                                |
| JTE-013 S1P allosteric antagonist        | N-(2,6-dichloropyridin-4-yl)-2-(4-isopropyl-1,3-dimethyl-1H-pyrazolo[3,4-b]pyridin-6-yl)hydrazine-1-carboxamide                                                                | 6700                                      | >10000                       | >10000                                |
| SKI-II Dual Sphingosine kinase inhibitor | 4-((4-(4-chlorophenyl)thiazol-2-yl)amino)phenol                                                                                                                                | 8836                                      | >10000                       | >10000                                |
| CPT2 Inhibitor                           | 2-((4-chloro-3-nitrophenyl)sulfonamido)benzoic acid                                                                                                                            | >10000                                    | >10000                       | >10000                                |
| Etomoxir CPT1: Transport Inhibitor       | ethyl (R)-2-(6-(4-chlorophenoxy)hexyl)oxirane-2-carboxylate                                                                                                                    | >10000                                    | >10000                       | >10000                                |
| ACSS2 Inhibitor                          | N-(3-(1,1-difluoroethyl)phenyl)-1-(4-(difluoromethoxy)-3-(pyridin-3-yl)phenyl)-3-methyl-5-oxo-4,5-dihydro-1H-pyrazole-4-carboxamide                                            | >10000                                    | >10000                       | >10000                                |
| DGAT2 Inhibitor                          | 3-(2-chlorophenyl)-1-(4-fluorophenyl)-N-(3-methyl-1,1-dioxidotetrahydrothiophen-3-yl)-1H-indole-6-carboxamide                                                                  | >10000                                    | >10000                       | >10000                                |
| Pradagilast, LCQ908 DGAT1: Inhibitor     | 2-(((1r,4r)-4-(4-(5-((6-(trifluoromethyl)pyridin-3-yl)amino)pyridin-2-yl)phenyl)cyclohexyl)acetic acid                                                                         | >10000                                    | >10000                       | >10000                                |
| DGAT1 Inhibitor                          | 2-(((1r,4r)-4-(4-(4-amino-5-oxo-7,8-dihydropyrimido[5,4-f][1,4]oxazepin-6(5H)-yl)phenyl)cyclohexyl)acetic acid                                                                 | >10000                                    | >10000                       | >10000                                |
| ACLY Inhibitor                           | methyl 3-chloro-5-(N-(4,6-difluoro-[1,1'-biphenyl]-3-yl)sulfamoyl)-4-hydroxybenzoate                                                                                           | >10000                                    | >10000                       | >10000                                |
| LXR Inverse Agonist                      | ethyl 5-(((2,4,6-trimethyl-N-((3'-(methylsulfonyl)-[1,1'-biphenyl]-4-yl)methyl)phenyl)sulfonamido)methyl)furan-2-carboxylate                                                   | >10000                                    | >10000                       | >10000                                |
| KHK Inhibitor                            | 2-(((1R,5S,6R)-3-(2-((S)-2-methylazetid-1-yl)-6-(trifluoromethyl)pyrimidin-4-yl)-3-azabicyclo[3.1.0]hexan-6-yl)acetic acid                                                     | >10000                                    | >10000                       | >10000                                |
| SCD1 Inhibitor                           | (R)-4-(((3S,5S,7R,8R,9S,10S,12S,13R,14S,17R)-7,12-dihydroxy-3-icosanamido-10,13-                                                                                               | >10000                                    | >10000                       | >10000                                |

|                                                                       |                                                                                                                                                    |        |        |        |
|-----------------------------------------------------------------------|----------------------------------------------------------------------------------------------------------------------------------------------------|--------|--------|--------|
|                                                                       | dimethylhexadecahydro-1H-cyclopenta[a]phenanthren-17-yl)pentanoic acid                                                                             |        |        |        |
| Fatostatin<br>SREBP<br>Processivity<br>Blocker                        | 2-(2-propylpyridin-4-yl)-4-(p-tolyl)thiazole                                                                                                       | >10000 | >10000 | >10000 |
| Betulin<br>SREBP<br>Processivity<br>Blocker                           | (1R,3aS,5aR,5bR,7aR,9S,11aR,11bR,13aR,13bR)-3a-(hydroxymethyl)-5a,5b,8,8,11a-pentamethyl-1-(prop-1-en-2-yl)icosahydro-1H-cyclopenta[a]chrysen-9-ol | >10000 | >10000 | >10000 |
| BioE-115<br>PASK (kinase)<br>modulator                                | 2-(4-fluorophenyl)-3-(isopropyl(methyl)amino)quinoxaline-6-carboxylic acid                                                                         | >10000 | >10000 | >10000 |
| FTY720 (S)-<br>phosphate)<br>S1PR<br>functional<br>antagonist         | (S)-2-amino-2-(hydroxymethyl)-4-(4-octylphenyl)butyl dihydrogen phosphate                                                                          | >10000 | >10000 | >10000 |
| FTY720,<br>Fingolimod<br>TY 52156<br>S1PR<br>functional<br>antagonist | 2-amino-2-(4-octylphenethyl)propane-1,3-diol                                                                                                       | >10000 | >10000 | >10000 |
